# Supplementary material for: Characterization and genome analysis of virulent phage against phytopathogen Pantoea ananatis and its potential biocontrol application
Source: Research Square preprint supplement (doi:10.21203/rs.3.rs-7572656/v1), 2025-11-06
Supplement: Supplementary file 1 [file 263e468320ddf0d9c6fc0a35.docx]

**Table 1** Bioactivity and specificity of phage PanM1EGY against a panel of pathogenic and antagonistic bacteria

| **Bacterium** | | **Bacterial species** | **Straina** | **Spot test*** | **Plaque assay*** |
| --- | --- | --- | --- | --- | --- |
|  | *Pantoea* spp. | *Pantoea ananatis* | Badr HH1 | + | + |
| *Pantoea ananatis* | PaH1 | + | + |
| *Pantoea ananatis* | KHM | + | + |
| *Pantoea ananatis* | PaA | + | + |
| *Pantoea ananatis* | PaH2 | + | + |
| Pathogenic  bacteria | *Pectobacterium* spp*.* | *Pectobacterium brasiliense* | KMBR1 | - | - |
| PbrH1 | - | - |
| *Pectobacterium*  *Atrosepticum* | MH3c | - | - |
| *Pectobacterium carotovorum* | 100H | - | - |
| *Pectobacterium aroidearum* | P.ash | - | - |
| *Pseudomonas* spp. | *Pseudomonas marginalis* | PMH2 | - | - |
| *Dickeya* spp. | *Dickeya chrysanthemi* | 300R1 | - | - |
| *Lysinibacillus boronitolerans* | | LBH4 | - | - |
| *Siccibacter turicensis* | | STH5 | - | - |
| *Corynebacterium* spp. | *Corynebacterium glutamicum* | CgH3 |  |  |
| *Robbsia andropogonis* (*Burkholderia andropogonis*) | | Ba | - | - |
| *Ralstonia solanacearum* (Phylotype IIA sequevar 1) | | K6 | - | - |
| K9 | - | - |
| K10 | - | - |
| *Rhizobium radiobacter* (*Agrobacterium tumefaciens*) | | AGt | - | - |
| *Erwinia amylovora* | | Ea | - | - |
| Antagonistic  bacteria | *Pseudomonas japonica* | | 447 | - | - |
| *Pseudomonas putida* | | 600B | - | - |
| *Pseudomonas fluorescense* | | AH | - | - |
| *Enterobacter aerogenes* | | 114 | - | - |
| *Bacillus thuringiensis* | | 400B | - | - |
| *Bacillus subtilis* | | 500B | - | - |
| *Serratia marcescens* | | 100B | - | - |
| *Pseudomonas aeruginosa* | | 177 | - | - |
| *Stenotrophomonas maltophilia* | | 300B | - | - |

aAll bacterial strains used in this study were isolated in Egypt (Elhalag et al. 2015; 2020; 2024; Farag et al. 2017) and maintained at the culture collection of the Bacterial Diseases Research Department, Plant Pathology Research Institute, Giza, Egypt.

The results were recorded as follows: (+), spot titration and plaques positive; (-), spot titration and plaques negative.
